# Supplementary material for: Effect of aerosol composition on the performance of low-cost optical particle counter correction factors
Source: Copernicus journal article supplement (doi:10.5194/amt-13-1181-2020), 2020-03-10
Supplement: Supplementary file 1 [file amt-13-1181-2020-supplement.pdf]

Supplement of Atmos. Meas. Tech., 13, 1181–1193, 2020  
<https://doi.org/10.5194/amt-13-1181-2020-supplement>  
© Author(s) 2020. This work is distributed under  
the Creative Commons Attribution 4.0 License.

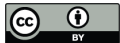

*Supplement of*

## **Effect of aerosol composition on the performance of low-cost optical particle counter correction factors**

**Leigh R. Crilley et al.**

*Correspondence to:* Leigh R. Crilley ([lcrilley@yorku.ca](mailto:lcrilley@yorku.ca))

The copyright of individual parts of the supplement might differ from the CC BY 4.0 License.

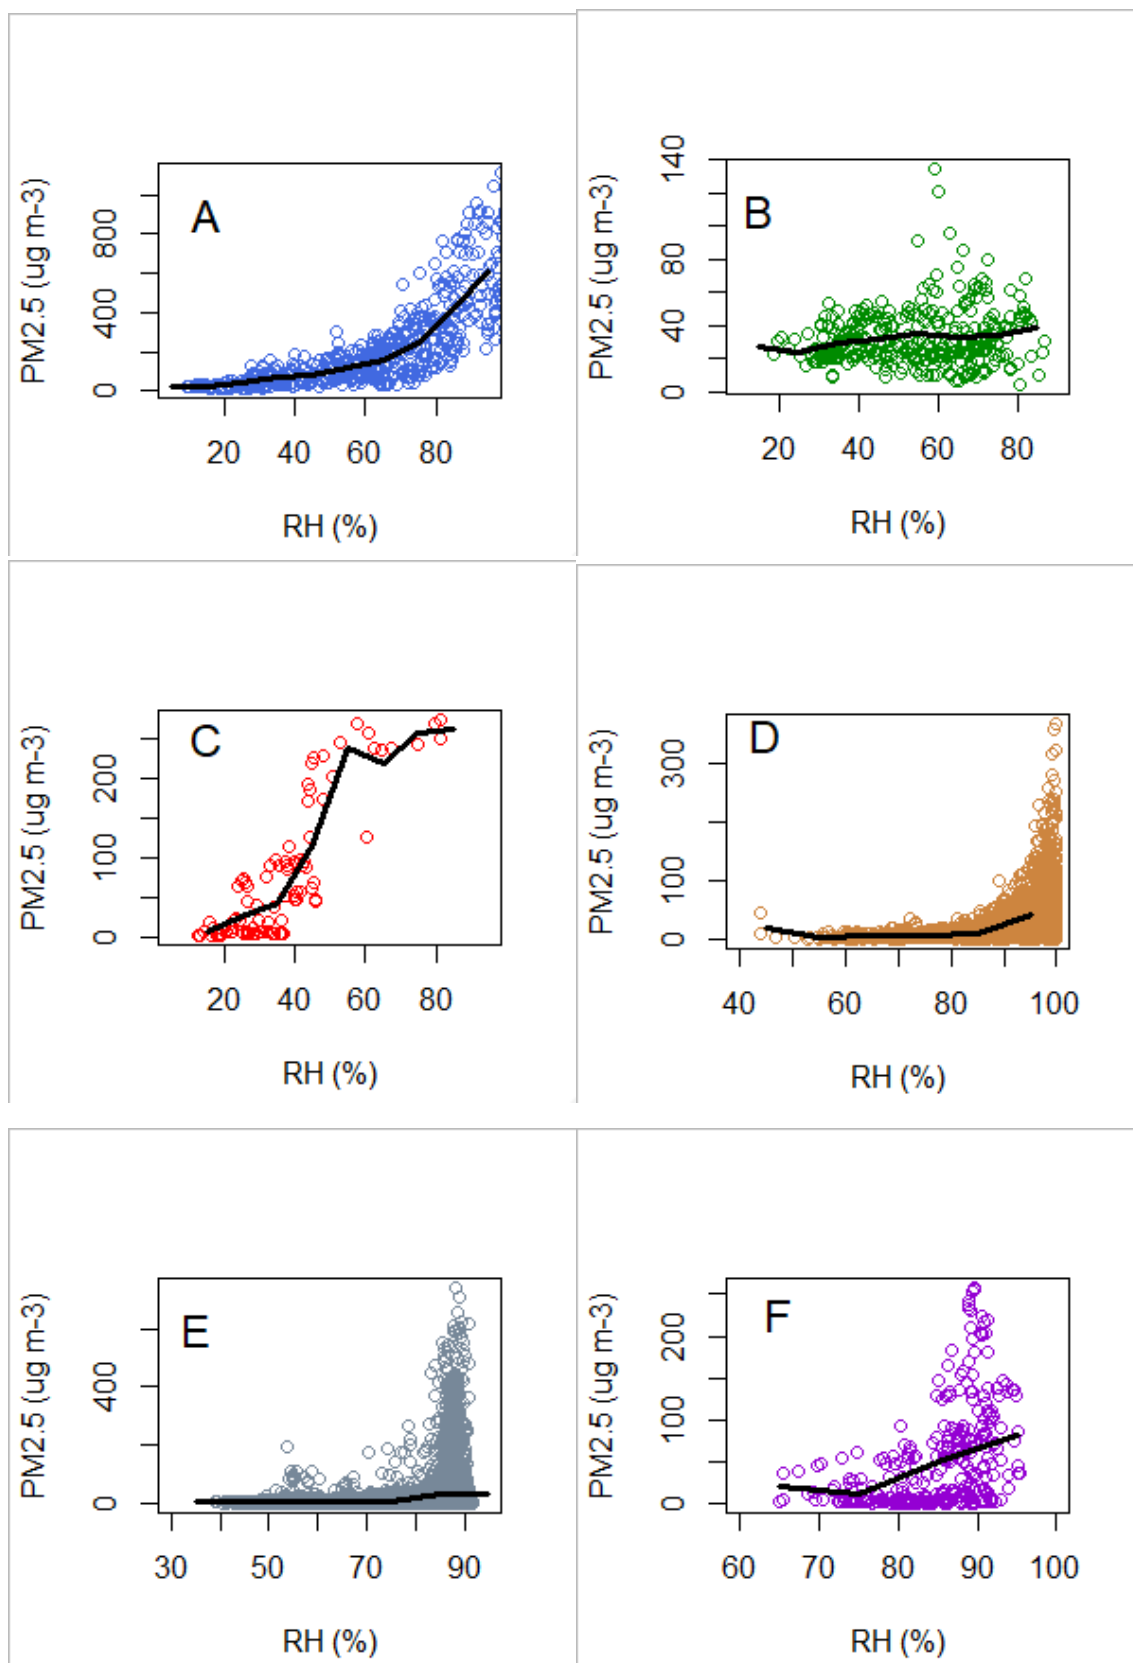

Figure S1: Plot of reported PM<sub>2.5</sub> mass concentration by OPC-N2 against ambient RH for the whole measurement period in Delhi (A), Nairobi (B), Beijing (C), Bham BAQS (D), Nicaragua (E), Bham Tyburn (F). The black line is the mean reported PM<sub>2.5</sub> mass concentration binned by RH (bin size 10% RH). Note the different y- and x-axis scales.

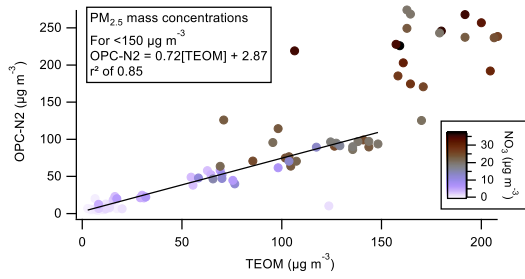

Figure S2: Uncorrected PM<sub>2.5</sub> by OPC-N2 against TEOM measurements coloured by nitrate concentration in Beijing.

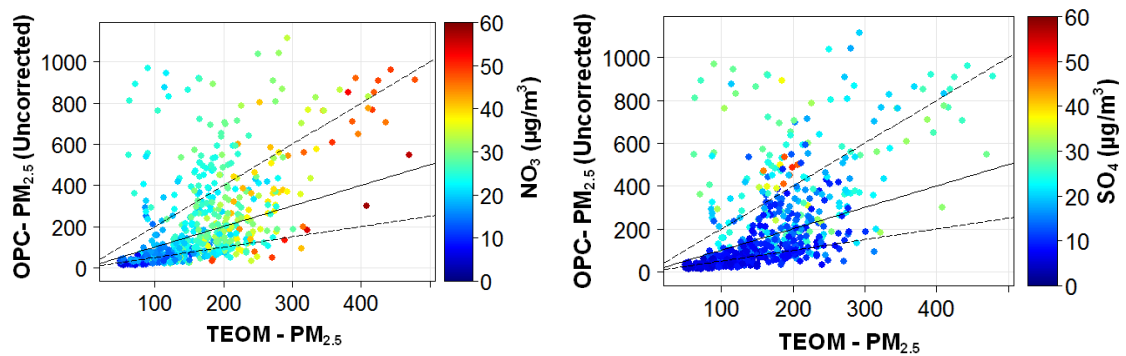

Figure S3: Uncorrected PM<sub>2.5</sub> by OPC-N2 against TEOM measurements coloured by nitrate and sulphate concentration in Delhi.

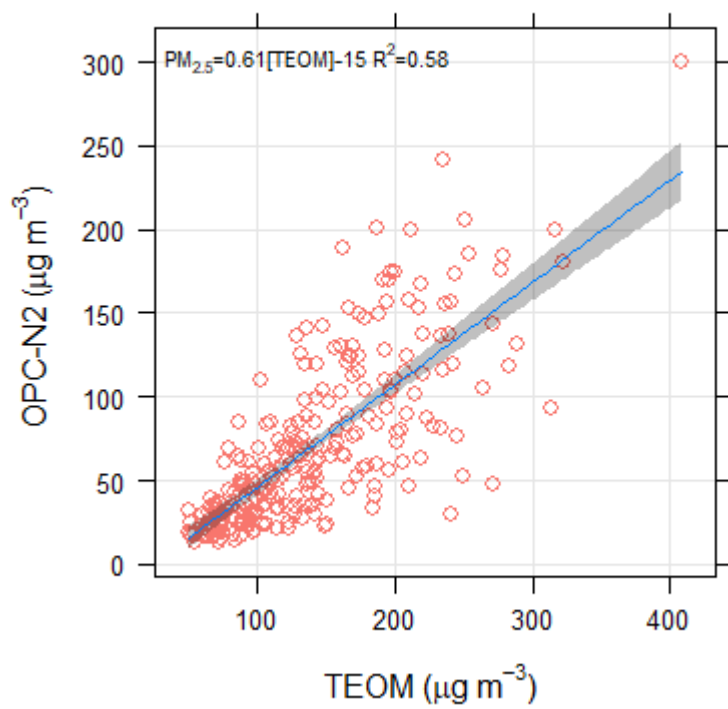

Figure S4: Scatterplot of uncorrected OC-N2 vs TEOM PM<sub>2.5</sub> measurements in Delhi for when the ambient RH was less than 60%.

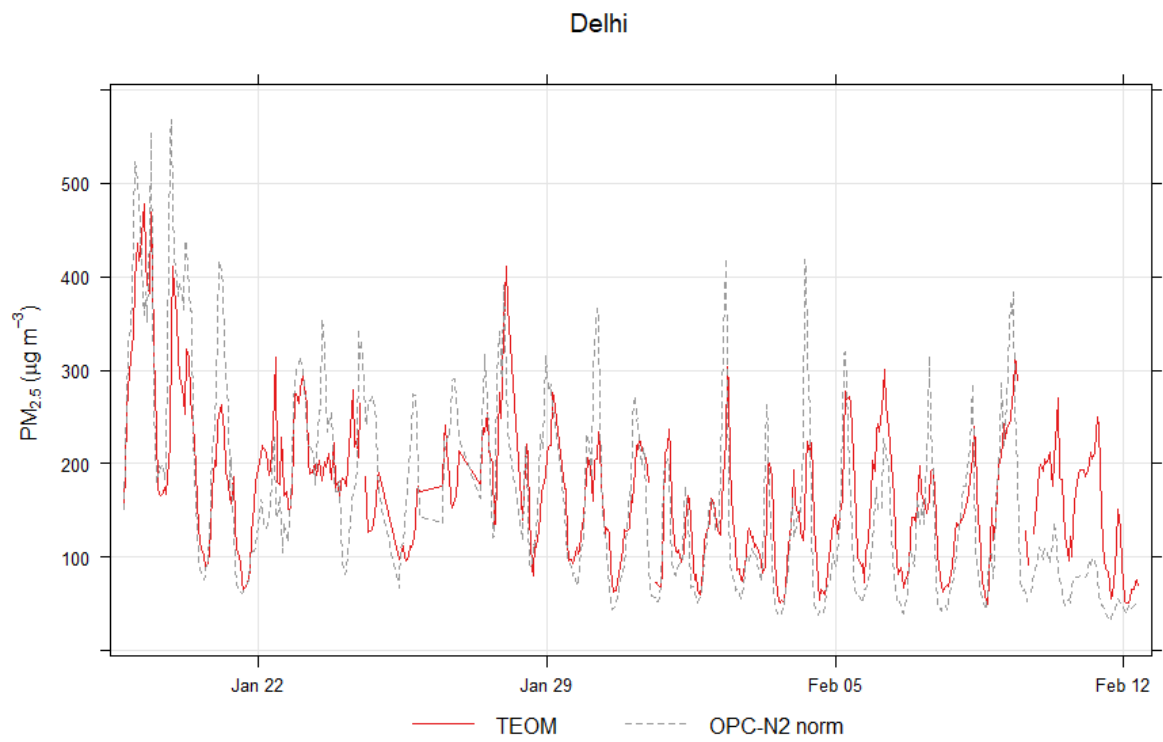

Figure S5: Time series of measured  $PM_{2.5}$  mass concentrations at Delhi by TEOM-FDMS and OPC-N2 corrected by the two-stage approach (Section 3.1.1)
